# Supplementary material for: Off like a shot: scaling of ballistic tongue projection reveals extremely high performance in small chameleons
Source: PubMed Central journal article supplement (PMC4698635; doi:10.1038/srep18625), 2016-01-04
Supplement: srep18625-s1.pdf [file srep18625-s1.pdf]

20 Oct 2015

Scientific Reports

**Off like a shot: scaling of ballistic tongue projection reveals extremely high performance in small chameleons**

Christopher V. Anderson\*

**SUPPLEMENTARY MATERIALS**

Department of Ecology and Evolutionary Biology, Brown University, Providence, RI 02912,  
USA

\*Author for correspondence: Department of Ecology and Evolutionary Biology, Brown  
University, Providence, RI 02912, USA  
(Christopher\_V\_Anderson@Brown.edu)

*Extreme performance in small chameleons*

Supplemental Table S1. Summary of maximal performance recorded for feedings from each individual included in study.

| Species                           | Individual      | Sex | <i>n</i> | SVL (mm) | Jaw length (mm) | Max. projection distance (mm) | Min. projection duration (ms) | Max. peak velocity (m s <sup>-1</sup> ) | Max. peak acceleration (m s <sup>-2</sup> ) | Max. peak muscle mass-specific power (W kg <sup>-1</sup> ) |
|-----------------------------------|-----------------|-----|----------|----------|-----------------|-------------------------------|-------------------------------|-----------------------------------------|---------------------------------------------|------------------------------------------------------------|
| <i>Bradypodion melanocephalum</i> | Bmelo01         | ♂   | 5        | 51       | 11.7            | 80.6                          | 19.3                          | 4.12                                    | 1,010                                       | 5,680                                                      |
| <i>Bradypodion melanocephalum</i> | Bmelo05         | ♂   | 2        | 55       | 12.4            | 83.2                          | 23.3                          | 3.92                                    | 940                                         | 5,280                                                      |
| <i>Bradypodion melanocephalum</i> | Bmelo06         | ♂   | 5        | 54       | 12.0            | 78.8                          | 26.7                          | 3.99                                    | 1,100                                       | 5,840                                                      |
| <i>Bradypodion melanocephalum</i> | Bmelo09         | ♂   | 5        | 53       | 12.4            | 80.5                          | 24.7                          | 4.29                                    | 920                                         | 4,920                                                      |
| <i>Bradypodion occidentale</i>    | Bocci04         | +   | 5        | 93       | 21.7            | 117.6                         | 28.0                          | 4.20                                    | 561                                         | 3,160                                                      |
| <i>Bradypodion occidentale</i>    | Bocci08         | +   | 5        | 92       | 20.6            | 94.1                          | 25.3                          | 3.86                                    | 565                                         | 2,880                                                      |
| <i>Bradypodion pumilum</i>        | Bpum03          | ♂   | 3        | 69       | 13.4            | 101.3                         | 34.7                          | 3.91                                    | 716                                         | 3,860                                                      |
| <i>Bradypodion pumilum</i>        | Bpum04          | +   | 5        | 64       | 14.9            | 101.9                         | 30.0                          | 3.74                                    | 589                                         | 3,020                                                      |
| <i>Bradypodion pumilum</i>        | Bpum06          | +   | 4        | 63       | 12.9            | 83.6                          | 27.3                          | 3.75                                    | 813                                         | 4,140                                                      |
| <i>Bradypodion pumilum</i>        | Bpum10          | ♂   | 6        | 70       | 17.2            | 116.5                         | 26.7                          | 3.85                                    | 686                                         | 3,580                                                      |
| <i>Bradypodion</i> sp. “emerald”  | Bsp01           | +   | 5        | 82       | 18.4            | 123.5                         | 40.0                          | 3.66                                    | 518                                         | 2,600                                                      |
| <i>Bradypodion</i> sp. “emerald”  | Bsp05           | +   | 10       | 69       | 16.8            | 129.9                         | 32.7                          | 4.59                                    | 786                                         | 5,100                                                      |
| <i>Bradypodion</i> sp. “emerald”  | Bsp06           | ♂   | 5        | 70       | 16.3            | 111.1                         | 29.0                          | 4.51                                    | 944                                         | 5,720                                                      |
| <i>Bradypodion</i> sp. “emerald”  | Bsp07           | +   | 10       | 77       | 16.4            | 137.4                         | 34.0                          | 4.11                                    | 715                                         | 3,900                                                      |
| <i>Bradypodion</i> sp. “emerald”  | Bsp08           | ♂   | 5        | 88       | 18.7            | 146.7                         | 33.3                          | 4.26                                    | 633                                         | 3,420                                                      |
| <i>Bradypodion thamnobates</i>    | Btham01         | +   | 10       | 96       | 20.1            | 141.6                         | 33.3                          | 3.84                                    | 549                                         | 2,940                                                      |
| <i>Bradypodion thamnobates</i>    | Btham03         | +   | 5        | 79       | 19.1            | 108.9                         | 38.7                          | 3.36                                    | 498                                         | 2,240                                                      |
| <i>Bradypodion thamnobates</i>    | Btham05         | ♂   | 5        | 53       | 13.3            | 103.5                         | 24.7                          | 4.27                                    | 907                                         | 4,680                                                      |
| <i>Bradypodion thamnobates</i>    | Btham06         | +   | 5        | 77       | 16.9            | 97.2                          | 20.0                          | 3.37                                    | 529                                         | 2,440                                                      |
| <i>Bradypodion thamnobates</i>    | Btham09         | ♂   | 5        | 73       | 17.6            | 122.8                         | 30.7                          | 3.98                                    | 736                                         | 3,660                                                      |
| <i>Bradypodion thamnobates</i>    | Btham10         | +   | 5        | 83       | 18.2            | 107.2                         | 37.3                          | 2.91                                    | 490                                         | 1,802                                                      |
| <i>Brookesia superciliaris</i>    | superciliaris01 | +   | 5        | 45       | 11.8            | 93.5                          | 19.7                          | 4.96                                    | 1,400                                       | 9,080                                                      |
| <i>Brookesia superciliaris</i>    | superciliaris02 | ♂   | 1        | 40       | 10.3            | 68.8                          | 17.7                          | 4.41                                    | 1,350                                       | 7,920                                                      |
| <i>Calumma p. parsonii</i>        | parsonii01      | +   | 8        | 194      | 43.7            | 199.7                         | 39.0                          | 4.94                                    | 417                                         | 2,880                                                      |
| <i>Chamaeleo calypratus</i>       | calypratus01    | ♂   | 10       | 135      | 32.9            | 195.8                         | 30.3                          | 4.59                                    | 514                                         | 3,480                                                      |
| <i>Chamaeleo calypratus</i>       | calypratus02    | ♂   | 10       | 135      | 31.1            | 123.9                         | 26.3                          | 3.85                                    | 363                                         | 2,100                                                      |
| <i>Chamaeleo calypratus</i>       | calypratus03    | ♂   | 10       | 140      | 34.1            | 182.8                         | 39.3                          | 4.45                                    | 406                                         | 2,720                                                      |
| <i>Chamaeleo calypratus</i>       | calypratus04    | ♂   | 5        | 140      | 30.0            | 101.0                         | 31.7                          | 3.43                                    | 305                                         | 1,612                                                      |

*Extreme performance in small chameleons*

|                                         |                |   |    |     |      |       |      |      |       |        |
|-----------------------------------------|----------------|---|----|-----|------|-------|------|------|-------|--------|
| <i>Chamaeleo calypttratus</i>           | calypttratus05 | ♂ | 10 | 125 | 30.9 | 189.6 | 31.3 | 4.61 | 503   | 3,240  |
| <i>Furcifer lateralis</i>               | lateralis01    | ♀ | 2  | 77  | 20.2 | 109.8 | 32.3 | 4.07 | 726   | 4,080  |
| <i>Furcifer oustaleti</i>               | oustaleti03    | ♂ | 5  | 189 | 49.0 | 267.6 | 54.3 | 4.82 | 440   | 2,980  |
| <i>Furcifer oustaleti</i>               | oustaleti04    | ♂ | 3  | 198 | 49.3 | 235.6 | 54.7 | 4.24 | 453   | 2,760  |
| <i>Furcifer oustaleti</i>               | oustaleti05    | ♀ | 5  | 196 | 43.5 | 175.0 | 47.3 | 3.57 | 286   | 1,410  |
| <i>Kinyongia fischeri</i>               | fischeri01     | ♂ | 4  | 114 | 24.2 | 179.0 | 37.0 | 4.50 | 661   | 4,420  |
| <i>Kinyongia fischeri</i>               | fischeri02     | ♂ | 5  | 104 | 23.3 | 177.2 | 41.3 | 4.83 | 580   | 3,820  |
| <i>Kinyongia tenuis</i>                 | tenuis01       | ♀ | 8  | 60  | 15.3 | 101.7 | 12.3 | 4.85 | 1,140 | 7,820  |
| <i>Rhampholeon acuminatus</i>           | acuminatus01   | ♀ | 3  | 54  | 12.0 | 97.1  | 22.7 | 5.19 | 1,300 | 8,840  |
| <i>Rhampholeon acuminatus</i>           | acuminatus02   | ♀ | 1  | 55  | 11.8 | 81.5  | 23.3 | 4.82 | 1,170 | 7,720  |
| <i>Rhampholeon spinosus</i>             | spinosus01     | ♀ | 4  | 47  | 11.6 | 111.3 | 18.3 | 5.05 | 1,770 | 12,100 |
| <i>Rhampholeon spinosus</i>             | spinosus02     | ♂ | 8  | 47  | 11.9 | 116.0 | 22.7 | 5.32 | 2,590 | 14,040 |
| <i>Rieppeleon brevicaudatus</i>         | Brev01         | ♂ | 6  | 55  | 14.2 | 99.5  | 12.3 | 5.41 | 1,620 | 11,620 |
| <i>Rieppeleon brevicaudatus</i>         | Brev02         | ♀ | 2  | 50  | 13.5 | 101.0 | 14.3 | 4.90 | 1,520 | 9,420  |
| <i>Rieppeleon brevicaudatus</i>         | Brev03         | ♂ | 3  | 50  | 13.4 | 88.4  | 15.0 | 4.64 | 1,340 | 8,240  |
| <i>Rieppeleon brevicaudatus</i>         | Brev04         | ♀ | 2  | 45  | 12.6 | 65.9  | 18.7 | 3.60 | 1,090 | 5,120  |
| <i>Rieppeleon brevicaudatus</i>         | Brev05         | ♂ | 1  | 45  | 11.5 | 37.0  | 9.7  | 4.15 | 1,210 | 6,740  |
| <i>Rieppeleon brevicaudatus</i>         | Brev06         | ♀ | 1  | 50  | 12.7 | 56.2  | 13.3 | 4.74 | 1,350 | 9,020  |
| <i>Rieppeleon brevicaudatus</i>         | Brev07         | ♀ | 2  | 45  | 12.0 | 49.2  | 11.0 | 4.29 | 1,480 | 8,660  |
| <i>Trioceros cristatus</i>              | cristatus01    | ♀ | 10 | 108 | 24.3 | 165.5 | 36.7 | 4.70 | 763   | 5,220  |
| <i>Trioceros hoehnelii</i>              | hoehnelii01    | ♂ | 7  | 88  | 23.0 | 203.3 | 44.3 | 4.06 | 757   | 3,480  |
| <i>Trioceros hoehnelii</i>              | hoehnelii02    | ♀ | 2  | 78  | 18.2 | 169.4 | 48.4 | 4.28 | 757   | 4,500  |
| <i>Trioceros hoehnelii</i>              | hoehnelii03    | ♀ | 3  | 75  | 17.9 | 110.7 | 31.0 | 4.03 | 751   | 4,240  |
| <i>Trioceros jacksonii xantholophus</i> | jacksonii01    | ♂ | 2  | 100 | 24.5 | 160.5 | 34.0 | 4.43 | 641   | 4,140  |
| <i>Trioceros johnstoni</i>              | johnstoni01    | ♂ | 3  | 115 | 25.2 | 193.0 | 47.7 | 4.60 | 608   | 4,000  |
| <i>Trioceros montium</i>                | montium01      | ♀ | 8  | 93  | 20.8 | 175.8 | 39.3 | 4.21 | 670   | 3,920  |
| <i>Trioceros montium</i>                | montium02      | ♂ | 5  | 107 | 23.7 | 159.0 | 33.3 | 4.49 | 701   | 4,560  |

The total number of feedings for each individual is given as *n*. Reported performance values represent the highest performance across all collected feedings for each individual.

*Extreme performance in small chameleons*

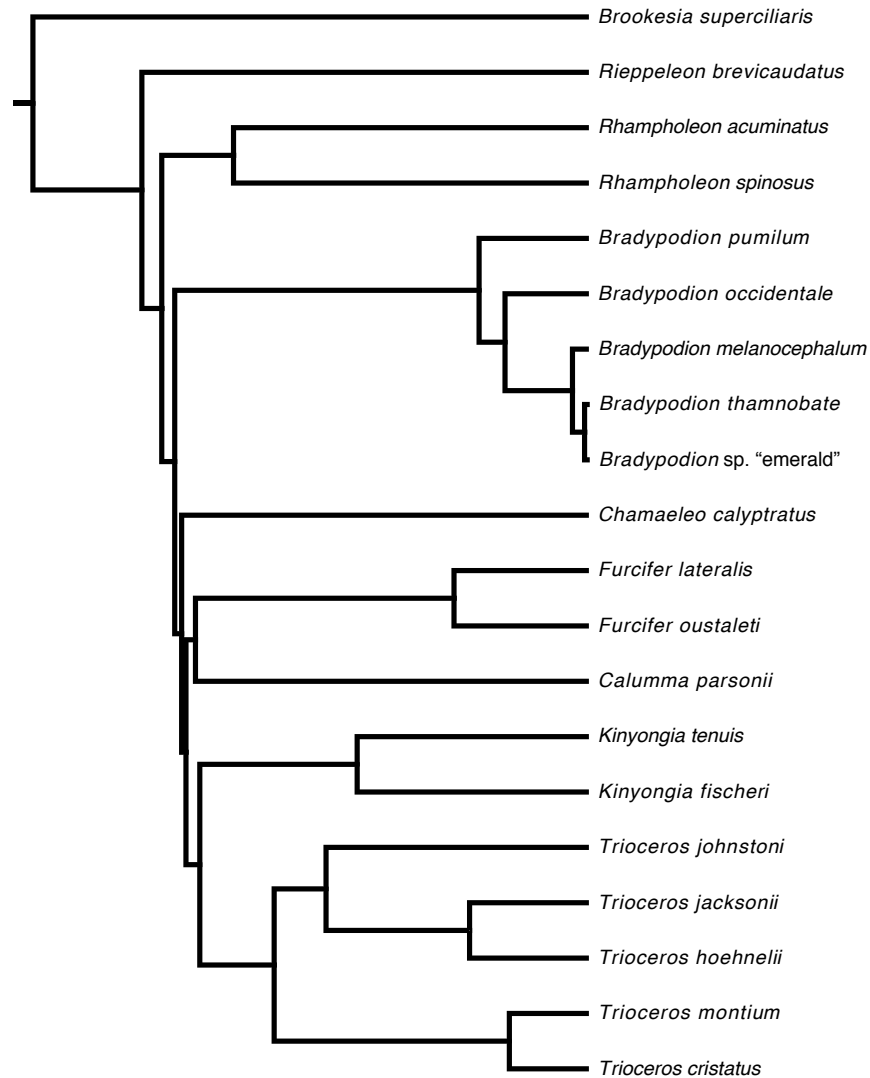

**Supplementary Fig. S1.** Chronogram estimating the relationships among species used in this study for phylogenetic comparative methods. Phylogenetic hypothesis based on a pruned chronogram from Tolley et al.<sup>49</sup> with the addition of *Bradypodion* sp. “emerald” as a sister taxon to *B. thamnobates* and assigned branch lengths close to zero based on other published studies incorporating this as yet undescribed taxon<sup>51-54</sup>.

*Extreme performance in small chameleons*

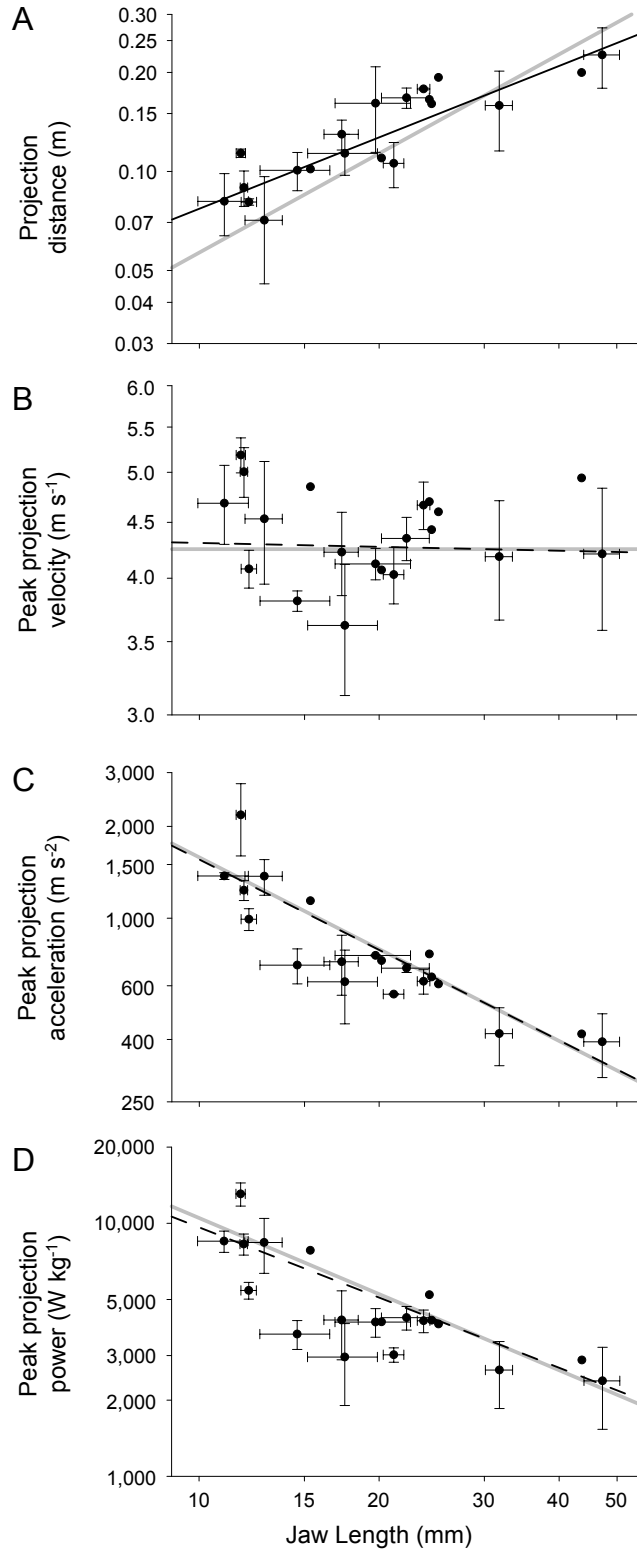

**Supplementary Fig. S2.** Scaling relationships among species for (A) peak projection distance, (B) peak projection velocity, (C) peak projection acceleration and (D) peak mass-specific power output with respect to jaw length. Graphs depict raw species averages and standard deviations of maximal performance for individuals on log axes. Solid light gray lines represent isometric slope. Dark gray lines represent observed scaling relationships among species. Solid dark gray lines represent observed scaling relationships significantly different from that expected by isometry (i.e., expected slope falls outside the 95% confidence interval around the observed slope). Dashed dark gray lines represent observed scaling relationships not significantly different from that expected by isometry.

**References**

49. Tolley, K. A., Townsend, T. M. & Vences, M. Large-scale phylogeny of chameleons suggests African origins and Eocene diversification. *Proc. R. Soc. B* **280**, 20130184 (2013).
51. da Silva, J. M. & Tolley, K. A. Ecomorphological variation and sexual dimorphism in a recent radiation of dwarf chameleons (*Bradypodion*). *Biol. J. Linn. Soc.* **109**, 113-130 (2013).
52. da Silva, J. M., Herrel, A., Measey, G. J. & Tolley, K. A. Sexual dimorphism in bite performance drives morphological variation in chameleons. *PLoS ONE* **9**, e86846 (2014).
53. Tolley, K. A., Tilbury, C. R., Branch, W. R. & Matthee, C. A. Phylogenetics of the southern African dwarf chameleons, *Bradypodion* (Squamata: Chamaeleonidae). *Mol. Phylogenet. Evol.* **30**, 534-565 (2004).
54. Tolley, K. A., Chase, B. M. & Forest, F. Speciation and radiations track climate transitions since the Miocene Climatic Optimum: a case study of southern African chameleons. *J. Biogeogr.* **35**, 1402-1414 (2008).
